# Supplementary material
Source: PubMed Central journal article supplement (PMC8018535)
Supplement: NIHMS1645338-supplement-2.pdf [file NIHMS1645338-supplement-2.pdf]

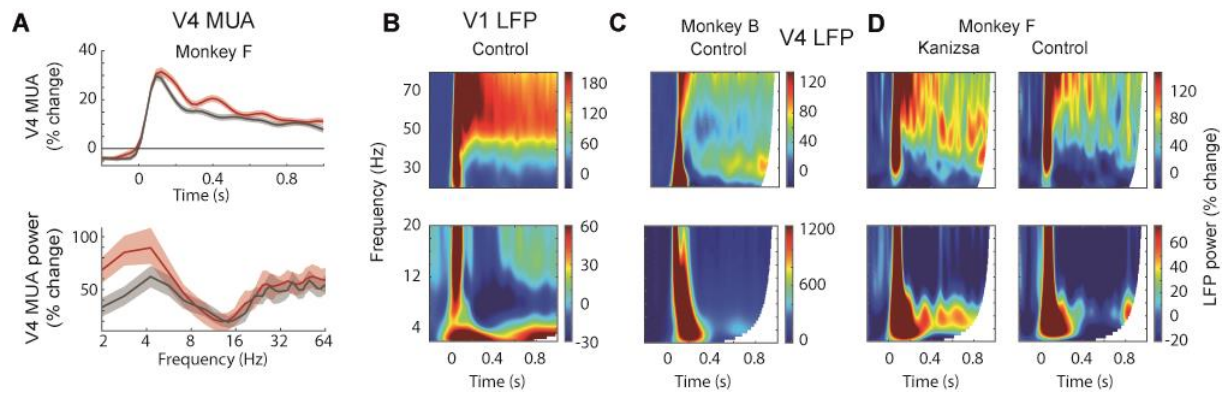

**Figure S1. Theta and gamma oscillations in V1 and V4. Related to Figure 1.**

**(A)** Same as Figure 1C, but for monkey F. Upper panel: example V4 MUA response from one representative electrode channel; lower panel: MUA powerspectrum for area V4 averaged across channels from monkey F. Kanizsa (red) and control conditions (gray), shaded areas depict SEM.

**(B)** Same as Figure 1D, but for the control condition. Time-frequency representations of V1 LFP, averaged across channels from monkey K for the control condition for low (lower panel) and high frequencies (top panel).

**(C)** Same as Figure 1E, but for the control condition. Time-frequency representations of V4 LFP, averaged across channels from monkey B for the control condition for low (lower panel) and high frequencies (top panel).

**(D)** Time-frequency representations of V4 LFP, averaged across channels from monkey F for the Kanizsa (left panels) and control condition (right panels) for low (lower panel) and high frequencies (top panel).

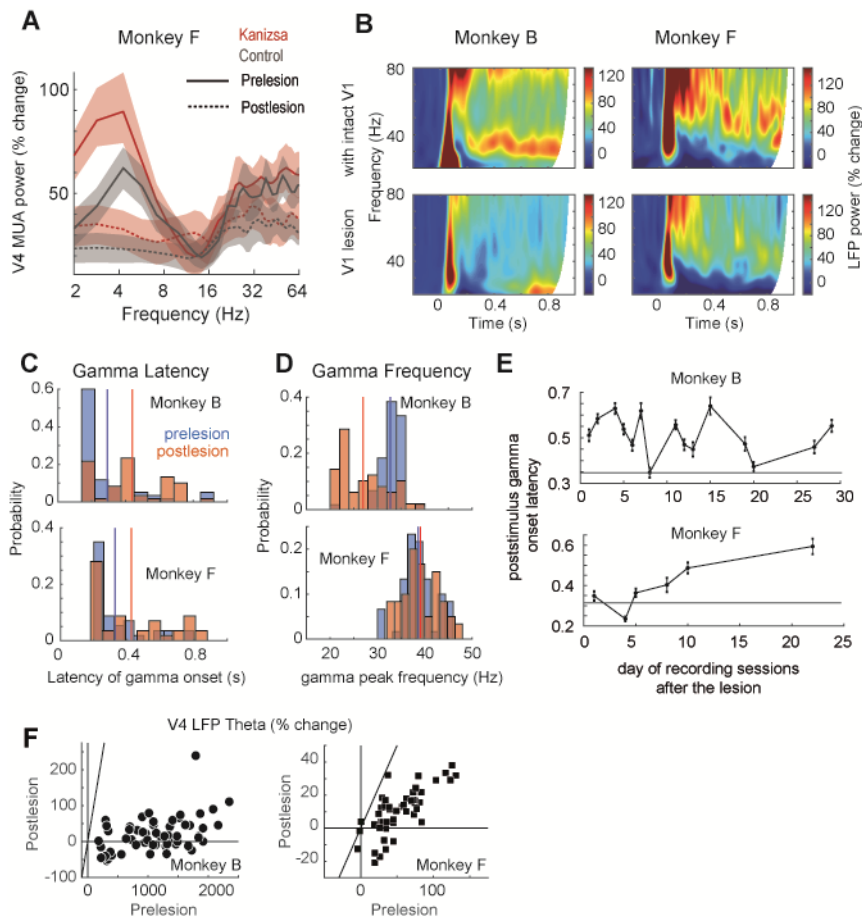

**Figure S2. V4 theta and gamma oscillations after V1 lesion. Related to Figure 4.**

**(A)** Same as Figure 4B, but for monkey F. MUA powerspectrum averaged across channels from monkey F for Kanizsa illusion (red) and control condition (gray) pre- (solid lines) and postlesion (dashed lines), showing the elimination of theta activity. Shaded areas depict SEM

**(B)** Time-frequency representations of V4 LFP, averaged across channels from monkey B (left panels) and monkey F (right panels) before (upper panels) and after the V1 lesion (lower panels). Note the presevation and delayed onset of gamma oscillations after the lesion.

**(C)** Histograms showing the distribution of the gamma onset latencies after stimulus onset across LFP channels for monkey B (upper panel) and monkey F (lower panel) before (blue) and after the lesion (orange). Vertical lines highlight mean values.

**(D)** Same as **(C)** but for gamma peak frequencies.

**(E)** Poststimulus gamma onset latencies as a function of postlesional recording sessions (e.g. day 1 = first recording session of the described experiments after the V1 lesion, not the first day after the lesion) averaged across LFP channels for monkey B (upper panel) and monkey F (lower panel). Horizontal lines depict prelesional mean latencies. Errorbars depict SEM.

**(F)** Same as Figure 4 G, left panel, but presenting data from both monkeys separately as scatter plots depicting V4 LFP theta power change distributions pre vs. postlesion for monkey B (left panel) and F (right panel). Each dot/square represents data from a single channel, averaged across trials.

**Table S1. MUA statistics with intact V1. Related to Figure 1.**

| Area                 | MUA increase for Kanizsa condition (mean $\pm$ SEM) | MUA increase for control condition (mean $\pm$ SEM) | Statistics (illusion > control, Wilcoxon paired signed rank test) | Related Figures                                               |
|----------------------|-----------------------------------------------------|-----------------------------------------------------|-------------------------------------------------------------------|---------------------------------------------------------------|
| <b>V1</b> (monkey K) | 10.1 $\pm$ 1.29%                                    | 9.4 $\pm$ 1.36%                                     | $p=0.07$ , n=61                                                   | Figure 1B                                                     |
| <b>V4</b> (monkey B) | 18.1 $\pm$ 1.15%                                    | 14.9 $\pm$ 1.17%                                    | $p=6.6 \times 10^{-6}$ , n=59                                     | Figure 1C (upper panel), Figure 4E-F, left panels and wings)  |
| <b>V4</b> (monkey F) | 7.7 $\pm$ 0.76%                                     | 6.9 $\pm$ 0.77%                                     | $p=0.001$ , n=54                                                  | Figure S1A (upper panel), Figure 4E-F, left panels and wings) |

**Table S2. V1 and V4 MUA oscillation statistics with intact V1. Related to Figure 1.**

| Area          | Theta power increase for Kanizsa condition (mean $\pm$ SEM) | Theta power increase for control condition (mean $\pm$ SEM) | Number of channels with significant theta increase to visual stimulation ( $p < 0.05$ , Wilcoxon signed rank test) | Statistics (illusion > control, Wilcoxon paired signed rank test) | Gamma Power increase for Kanizsa condition (mean $\pm$ SEM) | Gamma Power increase for control condition (mean $\pm$ SEM) | Number of channels with significant theta increase to visual stimulation ( $p < 0.05$ , Wilcoxon signed rank) | Statistics (illusion > control, Wilcoxon paired signed rank test) | Related Figures |
|---------------|-------------------------------------------------------------|-------------------------------------------------------------|--------------------------------------------------------------------------------------------------------------------|-------------------------------------------------------------------|-------------------------------------------------------------|-------------------------------------------------------------|---------------------------------------------------------------------------------------------------------------|-------------------------------------------------------------------|-----------------|
| V1 (monkey K) | 81.5 $\pm$ 2.89%                                            | 72.3 $\pm$ 3.12%                                            | 61/61 (100%)                                                                                                       | $p=0.01$ , n=61                                                   | 78.2 $\pm$ 2.36%                                            | 72.6 $\pm$ 2.39%                                            | 61/61 (100%)                                                                                                  | $p=0.03$ , n=61                                                   | Figure 1B       |
| V4 (monkey B) | 167.3 $\pm$ 21.29%                                          | 128.7 $\pm$ 28.39%                                          | 59/59 (100%)                                                                                                       | $p=1.1 \times 10^{-5}$ , n=59                                     | -                                                           | -                                                           | -                                                                                                             | -                                                                 | Figure 1C       |
| V4 (monkey F) | 79.4 $\pm$ 16.45%                                           | 63.3 $\pm$ 10.34%                                           | 31/54 (57%)                                                                                                        | $p=0.18$ , n=31                                                   | -                                                           | -                                                           | -                                                                                                             | -                                                                 | Figure S1A      |

**Table S3. V1 and V4 LFP oscillation statistics with intact V1. Related to Figure 1.**

| Area          | Number of channels with significant power increase to visual stimulation ( $p < 0.05$ , Wilcoxon signed rank test) | Number of channels with significant illusion-specific power increase ( $p < 0.05$ , Wilcoxon rank sum test) | Statistics (illusion > control, Wilcoxon paired signed rank test) | Related Figures |
|---------------|--------------------------------------------------------------------------------------------------------------------|-------------------------------------------------------------------------------------------------------------|-------------------------------------------------------------------|-----------------|
| Theta         |                                                                                                                    |                                                                                                             |                                                                   |                 |
| V1 (monkey K) | 61/61 (100%)                                                                                                       | 3/61 (4.9%)                                                                                                 | $p=0.99$ , n=61                                                   | Figure 1D, S1B  |
| V4 (monkey B) | 60/60 (100%)                                                                                                       | 59/60 (98%)                                                                                                 | $p=8.4 \times 10^{-12}$ , n=60                                    | Figure 1E, S1C  |
| V4 (monkey F) | 50/60 (83%)                                                                                                        | 27/50 (54%)                                                                                                 | $p=5.9 \times 10^{-10}$ , n=50                                    | Figure S1D      |
| Gamma         |                                                                                                                    |                                                                                                             |                                                                   |                 |
| V1 (monkey K) | 61/61 (100%)                                                                                                       | 10/61 (16.4%)                                                                                               | $p=0.97$ , n=61                                                   | Figure 1D, S1B  |
| V4 (monkey B) | 60/60 (100%)                                                                                                       | 36/60 (60%)                                                                                                 | $p=8.4 \times 10^{-12}$ , n=60                                    | Figure 1E, S1C  |
| V4 (monkey F) | 57/60 (95%)                                                                                                        | 47/57 (82%)                                                                                                 | $p=2.6 \times 10^{-11}$ , n=57                                    | Figure S1D      |

**Table S4. PAC statistics with intact V1. Related to Figure 2.**

| Area                 | MI for Kanizsa condition (mean $\pm$ SEM) | MI for control condition (mean $\pm$ SEM) | Statistics (illusion>control, Wilcoxon paired signed rank test) | Number of channels with significant PAC ( $p<0.05$ , permutation test) | Number of significantly illusion-modulated channels ( $p<0.05$ , Wilcoxon rank sum test) | Mean theta phase of highest gamma amplitude (mean $\pm$ SEM, illusion condition, 0° being the theta peak) | Related Figures |
|----------------------|-------------------------------------------|-------------------------------------------|-----------------------------------------------------------------|------------------------------------------------------------------------|------------------------------------------------------------------------------------------|-----------------------------------------------------------------------------------------------------------|-----------------|
| <b>V1</b> (monkey K) | 0.050 $\pm$ 0.0001                        | 0.050 $\pm$ 0.0002                        | $p=0.055$ , n=61                                                | 61/61 (100%)                                                           | 4/61 (6.5%)                                                                              | 151 $\pm$ 6.7°                                                                                            | Figure 2B       |
| <b>V4</b> (monkey B) | 0.045 $\pm$ 0.0003                        | 0.042 $\pm$ 0.0002                        | $p=7.7 \times 10^{-9}$ , n=60                                   | 60/60 (100%)                                                           | 13/60 (21.6%)                                                                            | -37 $\pm$ 2.2°                                                                                            | Figure 2C       |
| <b>V4</b> (monkey F) | 0.044 $\pm$ 0.0005                        | 0.042 $\pm$ 0.0003                        | $p=2.2 \times 10^{-5}$ , n=50                                   | 50/60 (83%)                                                            | 7/50 (14%)                                                                               | 29 $\pm$ 8.2°                                                                                             | Figure 2C       |

**Table S5. Postlesion MUA and LFP oscillation statistics. Related to Figure 4.**

| Monkey      | Statistics power (Pre>Post, Wilcoxon paired signed rank test) | Statistics postlesion (SNR>0, Wilcoxon signed rank test) | d' prelesion (mean ± SEM) | d' postlesion (mean ± SEM) | Statistics d' (Pre>Post, Wilcoxon paired signed rank test) | Statistics d' postlesion (d'>0, Wilcoxon signed rank test) | Related Figures           |
|-------------|---------------------------------------------------------------|----------------------------------------------------------|---------------------------|----------------------------|------------------------------------------------------------|------------------------------------------------------------|---------------------------|
| MUA – Theta |                                                               |                                                          |                           |                            |                                                            |                                                            |                           |
| Monkey B    | $p=1.4 \times 10^{-6}$ , n=59                                 | $p=0.75$ , n=59                                          | 0.37±0.03                 | -0.01±0.02                 | $p=8.5 \times 10^{-9}$ , n=42                              | $p=0.79$ , n=42                                            | Figure 4E-F, right panels |
| Monkey F    | $p=5.2 \times 10^{-4}$ , n=31                                 | $p=0.91$ , n=31                                          | 0.27±0.02                 | -0.07±0.10                 | $p=0.01$ , n=7                                             | $p=0.89$ , n=7                                             | Figure 4E-F, right panels |
| LFP –Theta  |                                                               |                                                          |                           |                            |                                                            |                                                            |                           |
| Monkey B    | $p=8.3 \times 10^{-12}$ , n=60                                | $p=0.46$ , n=60                                          | 0.53±0.02                 | 0.03±0.01                  | $p=1.2 \times 10^{-11}$ , n=59                             | $p=0.28$ , n=59                                            | Figure 4G-H, left panels  |
| Monkey F    | $p=4.4 \times 10^{-10}$ , n=50                                | $p=0.99$ , n=50                                          | 0.37±0.01                 | -0.14±0.03                 | $p=2.9 \times 10^{-6}$ , n=27                              | $p=0.99$ , n=27                                            | Figure 4G-H, left panels  |
| LFP – Gamma |                                                               |                                                          |                           |                            |                                                            |                                                            |                           |
| Monkey B    | $p=7.6 \times 10^{-6}$ , n=60                                 | $p=3.9 \times 10^{-11}$ , n=60                           | 0.22±0.01                 | 0.10±0.01                  | $p=3.3 \times 10^{-7}$ , n=36                              | $p=7.4 \times 10^{-7}$ , n=36                              | Figure 4G-H, right panels |
| Monkey F    | $p=3.8 \times 10^{-11}$ , n=57                                | $p=0.001$ , n=57                                         | 0.34±0.01                 | 0.12±0.02                  | $p=3.2 \times 10^{-9}$ , n=47                              | $p=1.9 \times 10^{-7}$ , n=47                              | Figure 4G-H, right panels |
